1     **INTRINSIC MOTOR NEURONE EXCITABILITY IS REDUCED IN SOLEUS AND**  
2                             **TIBIALIS ANTERIOR OF OLDER ADULTS**

3

4             Running title: Intrinsic motor neurone excitability is reduced with ageing.

5

6     Lucas B. R. Orssatto <sup>1\*</sup>, [l.betdarosaorssatto@qut.edu.au](mailto:l.betdarosaorssatto@qut.edu.au), <https://orcid.org/0000-0003-3788-3700>;

7     David N. Borg <sup>2</sup>, [david.borg@griffith.edu.au](mailto:david.borg@griffith.edu.au), <https://orcid.org/0000-0002-0152-571X>;

8     Anthony J. Blazevich <sup>3</sup>, [a.blazevich@ecu.edu.au](mailto:a.blazevich@ecu.edu.au), <https://orcid.org/0000-0003-1664-1614>;

9     Raphael L. Sakugawa <sup>4</sup>, [rlsakugawa@gmail.com](mailto:rlsakugawa@gmail.com), <https://orcid.org/0000-0002-4162-232X>;

10    Anthony J. Shield <sup>1</sup>, [aj.shield@qut.edu.au](mailto:aj.shield@qut.edu.au), <https://orcid.org/0000-0002-0393-2466>;

11    Gabriel S. Trajano <sup>1</sup>, [g.trajano@qut.edu.au](mailto:g.trajano@qut.edu.au), <https://orcid.org/0000-0003-4667-4257>.

12

13             <sup>1</sup> School of Exercise and Nutrition Sciences, Faculty of Health, Queensland University of  
14                             Technology (QUT), Brisbane, Australia.

15             <sup>2</sup> Griffith University, Menzies Health Institute Queensland, The Hopkins Centre, Brisbane,  
16                             Australia.

17             <sup>3</sup> Centre for Exercise and Sports Science Research (CESSR), School of Medical and Health  
18                             Sciences, Edith Cowan University, Joondalup, Australia.

19             <sup>4</sup> Biomechanics Laboratory, Department of Physical Education, Federal University of Santa  
20                             Catarina, Florianopolis, Brazil.

21

22     \*Corresponding author: Lucas Bet da Rosa Orssatto; email: [l.betdarosaorssatto@qut.edu.au](mailto:l.betdarosaorssatto@qut.edu.au);

23     <https://orcid.org/0000-0003-3788-3700>. School of Exercise and Nutrition Sciences, Faculty of

24     Health, Queensland University of Technology (QUT), Brisbane, Australia.

25 ABSTRACT

26

27 Age-related deterioration within both motor neurones and monoaminergic systems  
28 should theoretically reduce neuromodulation by weakening motor neuronal persistent inward  
29 current (PIC) amplitude. However, this assumption remains untested. Surface  
30 electromyographic signals were collected using two 32-channel electrode matrices placed on  
31 *soleus* and *tibialis anterior* of 25 older adults (70±4years) and 17 young adults (29±5 years)  
32 to investigate motor unit discharge behaviours. Participants performed triangular-shaped  
33 plantar and dorsiflexion contractions to 20% of maximum torque at a rise-decline rate of  
34 2%/s of each participant's maximal torque. Pairwise and composite paired-motor unit  
35 analyses were adopted to calculate delta frequency ( $\Delta F$ ), which has been used to differentiate  
36 between the effects of synaptic excitation and intrinsic motor neuronal properties and is  
37 assumed to be proportional to PIC amplitude. *Soleus* and *tibialis anterior* motor units in older  
38 adults had lower  $\Delta F$ s calculated with either the pairwise [-0.99 and -1.46 pps; -35.4 and -  
39 33.5%, respectively] or composite (-1.18 and -2.28 pps; -32.1 and -45.2%, respectively)  
40 methods. Their motor units also had lower peak discharge rates (-2.14 and -2.03 pps; -19.7  
41 and -13.9%, respectively) and recruitment thresholds (-1.50 and -2.06% of maximum,  
42 respectively) than young adults. These results demonstrate reduced intrinsic motor neurone  
43 excitability during low-force contractions in older adults, likely mediated by decreases in the  
44 amplitude of persistent inward currents. Our findings might be explained by deterioration in  
45 the motor neurones or monoaminergic systems and could contribute to the decline in motor  
46 function during ageing; these assumptions should be explicitly tested in future investigations.

47

48 Keywords: Persistent inward current; Ageing; Motor unit; HD-EMG; Motoneuron;

49 Sarcopenia.

## 50 INTRODUCTION

51           The age-related loss of force production has been comprehensively described in the  
52 literature [1–3], with the physiological alterations affecting force production including  
53 changes in several pathways within the nervous system [1,4–6]. The motor neurone is an  
54 important component of the nervous system affected by ageing as it is responsible for  
55 integrating and amplifying excitatory synaptic input into an appropriate motor output [7]. An  
56 essential intrinsic property of the motor neurone is its capacity to set up persistent inward  
57 currents (PICs), which are depolarising currents generated by voltage-sensitive sodium and  
58 calcium channels that increase cell excitability by amplifying and prolonging synaptic input  
59 [8,9]. Importantly, increases in the concentration of the monoamines serotonin and  
60 noradrenaline facilitate PIC development. Under conditions of high monoaminergic drive,  
61 synaptic input can be amplified by at least five-fold, suggesting that this amplification is a  
62 critical determinant of the motor neurone’s ability to achieve the discharge rates observed  
63 during normal motor behaviour [10–12]. Thus, potential physiological alterations in motor  
64 neurone intrinsic properties, or in the monoaminergic input to the motor neurone, might  
65 reduce the motor neurone’s ability to discharge at higher rates, thus reducing the ability to  
66 produce high muscle forces.

67           During ageing, several changes are observed in the motor neurones that might  
68 potentially reduce PIC amplitude in older adults, including lower discharge rates [13,14],  
69 reduced incidence of doublet discharges [15], and an increased afterhyperpolarisation  
70 duration [16]. These changes are consistent with the lower motor neurone excitability that is  
71 also observed in aged rat models [17,18]. With respect to the monoaminergic system,  
72 research using both human and animal models suggests that ageing is associated with reduced  
73 noradrenaline and serotonin secretions and thus input onto the motor neurones [19–23],  
74 which might theoretically underpin PIC amplitude reduction with ageing. These findings  
75 indicate the possibility that PIC amplitude might be reduced in older adults; however, this  
76 hypothesis remains to be tested [24].

77           The amplitude of PICs can be estimated in humans using the paired motor unit  
78 technique [8,25,26], with data obtained using high-density surface electromyography [27,28].  
79 This technique requires the pairing of the discharge rates of a low-threshold (control unit) to a  
80 higher-threshold (test unit) motor unit, obtained during a slowly-increasing and decreasing  
81 triangular-shaped contraction [8,25,29]. Subsequently, the difference in discharge rate of the  
82 control unit between the time of recruitment and de-recruitment of the test unit is computed  
83 as the change in frequency ( $\Delta F$ ).  $\Delta F$  has been used to differentiate between the effects of

84 synaptic excitation and motor neuronal intrinsic properties and is assumed to be proportional  
85 to PIC amplitude [9]. However,  $\Delta F$  values need to be interpreted with caution as they can be  
86 affected by spike frequency adaptation, spike frequency accommodation, and the proportion  
87 of sub-threshold PICs [8,30,31]. When controlling for these confounding factors, the  
88 technique can be used to estimate and compare PIC amplitudes in motor units of young and  
89 older adults.

90 The present study compared  $\Delta F$  amplitudes (i.e., estimates of PICs) of *soleus* and  
91 *tibialis anterior* motor units between young and older adults. Additionally, we explored the  
92 relationship between  $\Delta F$  and the peak discharge rates. We hypothesised that there would be a  
93 reduction in older adults'  $\Delta F$  in both *soleus* and *tibialis anterior*, and that  $\Delta F$  would be  
94 strongly associated with motor unit peak discharge rate. *Soleus* and *tibialis anterior* were  
95 selected for study because the control and timing of their activation are both critical to the  
96 performance of daily activities such as standing and walking in older adults [32,33].

97

## 98 METHODS

### 99 **Participants and ethical procedures**

100 Forty-four participants were recruited for the study, including 18 young adults and 26  
101 older adults (participant characteristics are documented in Table 1). More older adults were  
102 recruited because it was expected that fewer motor units would be identified during  
103 decomposition and that some participants may not be able to perform the triangle-shaped  
104 contractions with the necessary torque rise and fall accuracy. To participate, volunteers had  
105 to: a) be young adults aged 18 - 35 years or older adults  $\geq 65$  years; b) have no history of  
106 neurological disorders; c) be free of lower limb musculoskeletal injuries; and d) not be taking  
107 medications that could influence the monoaminergic system, including serotonin or  
108 noradrenaline modulators (e.g., beta-blockers and serotonin reuptake inhibitors). Also,  
109 participants were instructed to not consume caffeinated foods (e.g., coffee) 24 h before the  
110 testing session. Participants were excluded from the analyses if: a) no usable motor units  
111 were identified by the decomposition algorithm, or b) if it was not possible to achieve all the  
112 assumptions required in the paired motor unit analysis (as described below), for at least one  
113 pair of motor units, for either *soleus* or *tibialis anterior*. One participant per group was  
114 excluded from the study because no motor units were identified in either *soleus* or *tibialis*  
115 *anterior*. The study was approved by the University Human Research Ethics Committee, and  
116 all participants gave written informed consent before participating. Data collection was

117 conducted during the COVID-19 pandemic and all safety procedures followed the local state  
118 government policies.

119

120

121 **Table 1.** Participant characteristics.

| Variable                                       | Young Adults (n = 17) | Older Adults (n = 25) |
|------------------------------------------------|-----------------------|-----------------------|
| Age (years)                                    | 29 ± 5                | 70 ± 4                |
| Sex (n, %)                                     |                       |                       |
| Men                                            | 9 (53%)               | 11 (44%)              |
| Women                                          | 8 (47%)               | 14 (56%)              |
| Body mass (kg)                                 | 71.9 ± 13.6           | 77.8 ± 19.3           |
| Body fat (%)                                   | 20.2 ± 7.7            | 33.0 ± 10.0           |
| Apendicular skeletal muscle mass (kg)          | 25.2 ± 6.7            | 21.6 ± 5.1            |
| Height (cm)                                    | 175 ± 11              | 166 ± 9               |
| Handgrip strength (kg)                         | 40.3 ± 13.3           | 26.4 ± 10.5           |
| Peak torque (N·m)                              |                       |                       |
| Plantar flexion                                | 156 ± 47              | 85 ± 32               |
| Dorsiflexion                                   | 41 ± 14               | 29 ± 7                |
| Normalised peak torque (N·m·kg <sup>-1</sup> ) |                       |                       |
| Plantar flexion                                | 2.13 ± 0.49           | 1.11 ± 0.37           |
| Dorsiflexion                                   | 0.56 ± 0.09           | 0.38 ± 0.10           |
| Functional capacity                            |                       |                       |
| Timed up-and-go (s)                            | -                     | 6.1 ± 1.0             |
| 5-times sit-to-stand (s)                       | -                     | 13.4 ± 2.9            |
| Physical activity level (MET-min/week)         | 2541 (1902–3039)      | 2994 (1386–5139)      |

122 Note: Data are presented as mean ± standard deviation, except for Physical activity level,  
123 which is presented as median with interquartile range. MET-min/week, metabolic equivalent  
124 of task score of the performed physical activities by the minutes accomplished per week.

125

## 126 **Study design and testing procedures**

127 Participants visited the laboratory on a single occasion in which they were  
128 familiarised with the testing procedures and data were collected. Initially, participants signed  
129 the informed consent form, and completed the International Physical Activity Questionnaire

130 (short-version), which was used to estimate weekly physical activity levels based on the  
131 metabolic equivalent of a task (MET – i.e., multiples of the resting metabolic rate) for each  
132 physical activity domain. MET scores for each activity were multiplied by the minutes  
133 performed in one week, providing the total MET-min/week [34,35]. Physical activity levels  
134 were interpreted based on the recommendations of the Guidelines for Data Processing and  
135 Analysis of the International Physical Activity Questionnaire (IPAQ) [35]. Thereafter, body  
136 composition assessment was conducted with a multi-frequency bioelectrical impedance  
137 device (MC-780, Tanita, Japan), which provided body fat percentage and appendicular  
138 skeletal muscle mass data.

139         After electrode placement on *soleus* and *tibialis anterior*, the participants were seated  
140 upright in the chair of an isokinetic dynamometer (Biodex System 4, Biodex Medical system,  
141 Shirley, NY) with the knee fully extended ( $0^\circ$ ) and ankle in the anatomical position ( $0^\circ$ ). A  
142 warm-up consisting of six 5-s submaximal voluntary isometric plantar and dorsiflexion  
143 contractions ( $2 \times 30\%$ ,  $2 \times 60\%$ , and  $2 \times 80\%$  of perceived maximal effort) was performed,  
144 followed by three maximal voluntary contractions of ~3-s with 30-s rest intervals. The  
145 maximum torque achieved was recorded as the maximal voluntary contraction peak torque,  
146 which was also normalised to body mass. Subsequently, participants were familiarised with  
147 the triangular-shaped contractions to 20% of their maximum voluntary torque level.  
148 Triangular contractions to 20% of maximal torque have been extensively used for  $\Delta F$   
149 calculations using the paired motor unit technique [8,31,36–38], and this force was  
150 considered similar to the average torques developed during daily activities such as standing  
151 [39] and walking. All contractions had a duration of 20 s (10-s up and 10-s down) and were  
152 performed at a rate of torque increase and decrease of ~2%/s. Participants were instructed to  
153 follow the torque path provided in real time on a 58-cm computer monitor during each  
154 contraction. Data collection commenced 5 min after the end of familiarisation (usually  
155 requiring ~3-10  $\times$  20% triangular contractions with 30-s rest), during which the participants  
156 then performed four triangular contractions with 60-s rest intervals. When an abrupt increase  
157 or decrease in torque was observed (i.e., the torque trajectory was not closely followed), the  
158 trial was excluded and repeated. The maximum voluntary isometric torque and order of  
159 triangular contraction completion was randomised between *soleus* and *tibialis anterior*.

160         After the neuromuscular assessments, the participants performed a handgrip strength  
161 test using a grip force transducer (ADInstruments, Australia). They performed 3 submaximal  
162 (50% of their perceived maximal effort) familiarisation contractions, followed by 3  $\times$  3-s  
163 maximal contractions with 30-s rest intervals. The maximum force achieved was recorded as

164 their handgrip strength. Thereafter, they performed sit-to-stand and timed up-and-go  
165 (functional capacity) tests, timed off-line with video recordings as recommended by da Silva  
166 et al. [40] to reduce measurement error. The 5-times sit-to-stand required the participants to  
167 stand up five times until they reached upright standing and then returned to the seated posture  
168 on a chair (seat 46 cm high). The timed up-and-go test required the participants to rise from a  
169 chair (seat 46 cm high), walk towards and around a cone 3 m from the chair, return to the  
170 starting position, and to sit without the aid of hands and not running, in the shortest possible  
171 time. The fastest of three attempts (60-s rest between) was analysed.

172 The participants' sarcopaenia status was screened according to the cut-off points and  
173 algorithm from the European Working Group on Sarcopenia in Older People (EWGSOP2)  
174 [48]. According to this scale, older adults with low handgrip strength (<27 kg for men or <16  
175 kg for women) are classified as "sarcopaenia probable", and if this is accompanied by low  
176 appendicular skeletal muscle mass (<20 kg for men and <15 kg for women) then they are  
177 confirmed as sarcopaenic. Older adults with confirmed sarcopenia who take longer than 20 s  
178 to perform the timed up-and-go test are classified as having severe sarcopaenia. Also,  
179 participants with timed up-and-go performance under 12 s are classified as having normal  
180 mobility [41].

181

## 182 **Surface electromyography**

183 Surface electromyograms (sEMG) were recorded during the 20% triangular  
184 contractions using four semi-disposable 32-channel electrode grids with a 10-mm  
185 interelectrode distance (ELSCH032NM6, OTBioelettronica, Torino, Italy). After skin  
186 shaving, abrasion, and cleansing with 70% isopropyl alcohol, two electrode grids were placed  
187 over the medial and lateral portions of *soleus* (either side of the Achilles tendon) and another  
188 two electrode grids were placed over the superior and inferior aspect of *tibialis anterior* using  
189 a bi-adhesive foam layer and conductive paste (Ten20, Weaver and Company, Colorado,  
190 USA). A strap electrode (WS2, OTBioelettronica, Torino, Italy) was dampened and  
191 positioned around the ankle joint as a ground electrode. The sEMG signals were acquired in  
192 monopolar mode, amplified (256×), band-pass filtered (10–500 Hz), and converted to a  
193 digital signal at 2048 Hz by a 16-bit wireless amplifier (Sessantaquattro, OTBioelettronica,  
194 Torino, Italy) using OTBioLab+ software (version 1.3.0., OTBioelettronica, Torino, Italy)  
195 before being stored for offline analysis.

196

## 197 **Motor unit analyses**



198 *Motor unit identification*

199 The recorded data were processed offline using the DEMUSE software [27]. For each  
200 muscle, only the triangular contraction yielding the lowest deviation from the torque  
201 trajectory was analysed. If both contractions presented a similar torque trajectory, the  
202 contraction with the highest number of identified motor units was analysed. High-density  
203 sEMG signals were band-pass filtered (20-500 Hz) with a second-order, zero-lag Butterworth  
204 filter. Thereafter, a blind source separation method, the convolutive kernel compensation  
205 (CKC) method, was used for signal decomposition [27,42] from each triangular contraction.  
206 CKC yields the filters of individual motor units (so-called motor unit filters) that, when  
207 applied to high-density sEMG signals, estimate the motor unit spike trains [27,42]. After  
208 decomposition, a trained investigator manually inspected motor unit spike trains and edited  
209 the discharge patterns of the motor units. Only the motor units with a pulse-to-noise ratio  
210 equal to or greater than 30 dB were kept for further analysis [42].

211

212 *Estimation of PIC amplitude ( $\Delta F$ ) and peak discharge rate*

213 The observed discharge events for each motor unit were converted into instantaneous  
214 discharge rates and fitted into a 5<sup>th</sup>-order polynomial function. The maximum value obtained  
215 from the polynomial curve was considered the peak discharge rate. The relative torque (%)  
216 produced at the time in each motor unit was recruited was considered the recruitment  
217 threshold. The recruitment threshold was used to characterise the populations of motor units  
218 identified by the decomposition algorithm for each group. Thereafter, PIC amplitude was  
219 estimated using the paired motor unit analysis [8], referred through the manuscript as  
220 pairwise method. Motor units with a low recruitment threshold (i.e., control units) were  
221 paired with higher recruitment threshold motor units (i.e., test units).  $\Delta F$  was calculated as the  
222 change in discharge rates of the control motor unit from the moment of recruitment to the  
223 moment of de-recruitment of the test unit [8,9]. In order to produce motor unit pairs, the  
224 following criteria were adopted: 1) rate-to-rate correlations between the smoothed discharge  
225 rate polynomials of the test and control units was  $r \geq 0.7$ ; 2) test units were recruited at least  
226 1.0 s after the control units; and 3) the control unit did not show discharge rate saturation  
227 after the moment of test unit recruitment (i.e., discharge rate from the control unit at the  
228 moment the test unit was recruited minus the peak discharge rate at the control unit  $> 0.5$  pps)  
229 [8,38,43–45].  $\Delta F$ s obtained for each control unit were averaged to obtain a single  $\Delta F$  for each  
230 test motor unit.



231 We also conducted an additional analysis using the composite paired motor unit  
232 method to calculate  $\Delta F$  values for each motor unit [31]. This method is characterised by the  
233 overlay of 3 lower-threshold motor units to construct a single composite control unit profile  
234 to be paired with the test units. The composite method has been suggested to address some of  
235 the limitations observed with the pairwise method, such as underestimation and  
236 overestimation of  $\Delta F$  values, reducing its variability. However, strict assumptions are made  
237 for eligible motor units to be included in the analysis, which allows its use only in muscles in  
238 which it is possible to identify many motor units (e.g., *tibialis anterior*) but not in those in  
239 which fewer motor units are identified using the decomposition method (e.g., *soleus*).  
240 Moreover, this method does not allow calculation of  $\Delta F$  values for lower-threshold motor  
241 units since they are used to construct the composite control unit. In summary, the control unit  
242 is the overlay of the instantaneous discharge rate of at least three motor units recruited at <3%  
243 of the maximum voluntary torque and presenting a similar discharge profile, which was  
244 determined visually by an experienced researcher with individual motor units discharge rates  
245 plotted superimposed to each other. This is followed by the application of the 5<sup>th</sup> order  
246 polynomial over the overlaid motor units discharge rates. It was assumed that lower-  
247 threshold motor units had their discharge rate profile more linearly related to the synaptic  
248 input profile because PICs were almost fully activated at the time of recruitment; therefore, it  
249 would be more appropriate to use the composite unit as control. Also, this method requires  
250 the removal of the acceleration phase of the discharge rates (i.e., secondary range), making  
251 the polynomial ascending-to-descending slope ratio near 1, which is important when  
252 measuring PIC amplitudes to avoid any rate-dependent effects on motor unit recruitment or  
253 derecruitment [46]. The secondary range was determined with visual inspection of deflection  
254 point following Afsharipour et al., [31] procedures. The test units should start discharging in  
255 the tertiary range (i.e., after the secondary range and before the descending phase). This  
256 method provides a single  $\Delta F$  for each motor unit, which was then used in the data analysis.  
257 Figure 1 illustrates the pairwise and composited paired motor unit analysis methods on  
258 *tibialis anterior* motor units for one participant per group. Panels C and D display the test  
259 units used for both methods. Panels E and F display the control units for the pairwise method  
260 and panels G and H display the control units for the composite method.

261

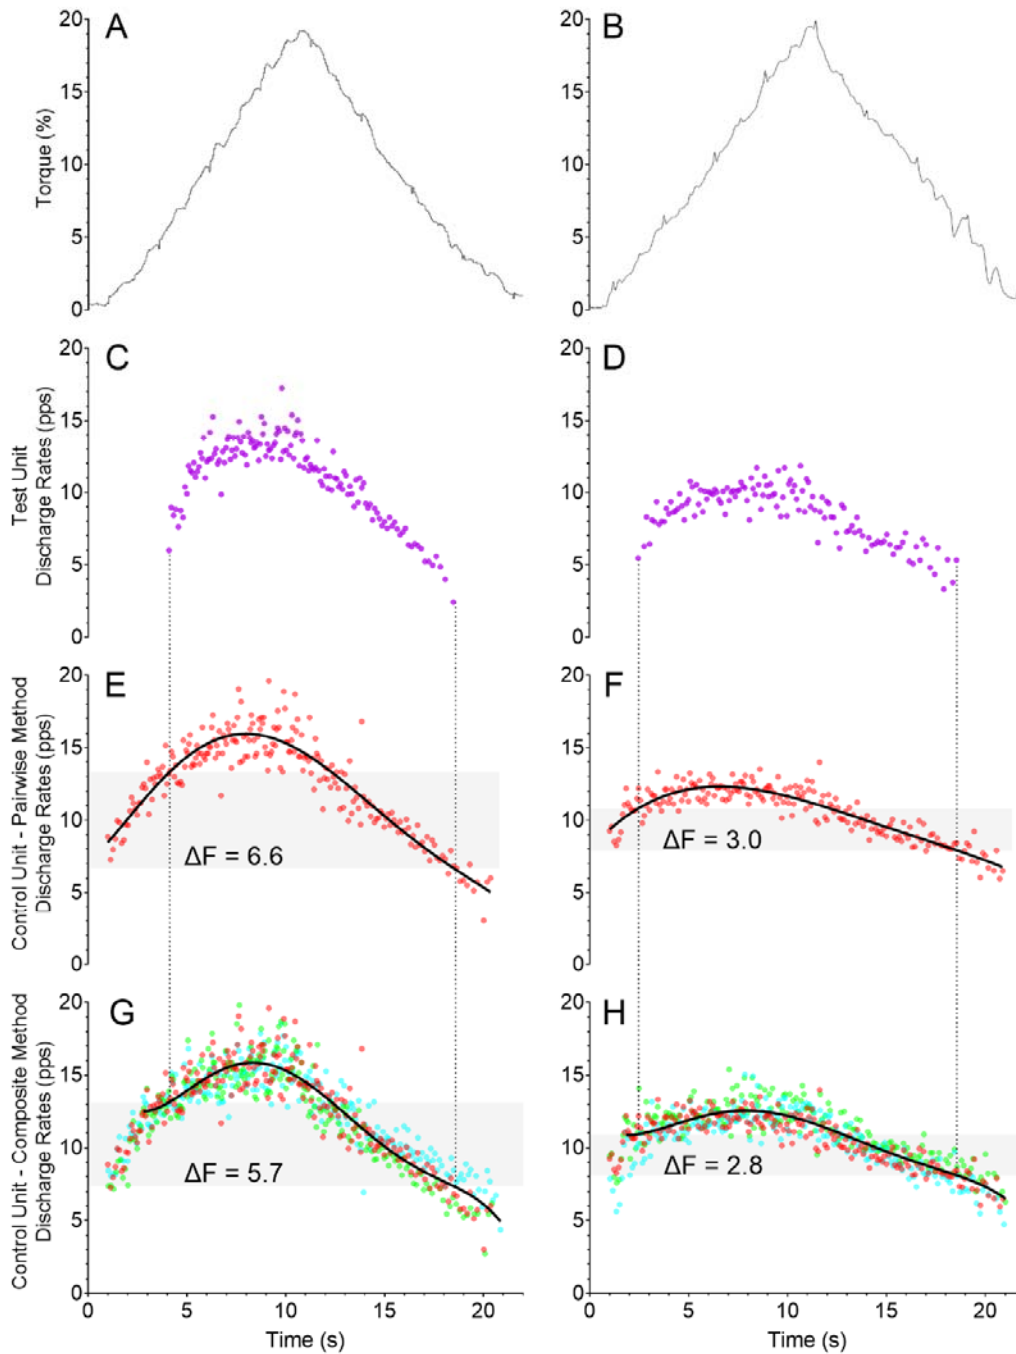

262

263 **Figure 1.** Data from a single participant for each group showing torque during triangle-  
264 shaped contractions and delta frequency ( $\Delta F$ ) calculation in *tibialis anterior* for both the  
265 pairwise and composite paired motor unit analyses. Data from a young adult is displayed in  
266 the left panels and from an older adult in the right panels. Panels A and B on the first row  
267 show the torque traces for contractions with 20% of the participant's maximal voluntary  
268 torque. The participants' test units are displayed on panels C and D (purple motor unit),

269 control units for the pairwise method on panels E and F (red motor unit), and control units for  
270 the composite method on panels G and H (red, green, and blue motor units). The black  
271 continuous lines are the 5<sup>th</sup>-order polynomial fits for the control units. Note that for the  
272 composite method the polynomial curve starts from the tertiary range. The gray-shaded areas  
273 represent the  $\Delta F$  amplitude for each participant and analysis.

274

## 275 **Data analysis**

276 All analyses were undertaken in R (version 4.0.3) using RStudio environment  
277 (version 1.3.1093). Models were fitted using the *lmerTest* package [47]. A linear mixed-  
278 effects model was used to compare estimates of  $\Delta F$  of *soleus* and *tibialis anterior* motor units  
279 between young and older adults. The model included: age group, muscle type and recruitment  
280 threshold as fixed effects. A random intercept and correlated random slopes (recruitment  
281 threshold and muscle type) were included for each participant in the study, to account for the  
282 correlation between repeated observations on each individual. This model was selected from  
283 a series of candidate models (Supplement 1), based on the smallest Bayesian Information  
284 Criteria value. The recruitment threshold was standardised (mean = 0, SD = 1) before  
285 analysis.

286 Separate linear mixed-effects models were used to analyse peak discharge rate and  
287 recruitment threshold data. These models included: age group, muscle type and age group by  
288 muscle type as fixed factors; and a random intercept and slope (muscle group) for each  
289 participant. The estimated marginal mean difference and 90% and 95% confidence intervals  
290 (CI) in  $\Delta F$ , peak discharge rate, and recruitment threshold between young and older adults,  
291 were determined using the *emmeans* package [48]. The standardised difference, denoted  $d$ ,  
292 was also calculated using the population SD from each respective linear mixed-effects model  
293 as the denominator [48].

294 To determine the contribution of  $\Delta F$  to peak discharge rate, a linear mixed-effects  
295 model was fitted, with the coefficient of determination ( $R^2$ ) used to quantify the proportion of  
296 the variance in peak discharge rate explained by  $\Delta F$  [49]. The model included  $\Delta F$  as a fixed  
297 effect and a random intercept and slope ( $\Delta F$ ) for each participant, to account for the  
298 correlation of repeated measurements on an individual.  $\Delta F$  was standardised (mean = 0, SD =  
299 1). Differences between young and older adults in peak plantar flexion and dorsiflexion  
300 torque, and physical activity levels, were determined using independent  $t$ -tests. The  $\alpha$  level

301 for all tests was 5%. The dataset and R code can be found at [https://github.com/orssatto/PICs-](https://github.com/orssatto/PICs-ageing)  
302 ageing.

303

## 304 RESULTS

### 305 **Effects of age and muscle group on $\Delta F$ , peak discharge rate, and recruitment threshold**

306 Motor units of older adults identified by the decomposition algorithm in our study had  
307 lower  $\Delta F$ s and peak discharge rates and were recruited at lower torque (muscle force) levels  
308 than young adults in both *soleus* and *tibialis anterior* (Figure 2, panels A, B, and C,  
309 respectively). Also,  $\Delta F$  levels and peak discharge rates were lower in *soleus* than *tibialis*  
310 *anterior*, independent of age (Figure 2, panels A and B).

311 There were effects of age ( $\beta = -0.99$ , 95% CI =  $-1.42, -0.57$ ;  $p < .001$ ), muscle ( $\beta =$   
312  $1.56$ , 95% CI =  $1.05, 2.07$ ;  $p < .001$ ) and recruitment threshold ( $\beta = 0.47$ , 95% CI =  $0.27,$   
313  $0.66$ ;  $p < .001$ ) but no age group by muscle effect ( $\beta = -0.47$ , 95% CI =  $-1.15, 0.21$ ;  $p = .18$ ),  
314 on  $\Delta F$  when calculated using the pairwise paired motor unit method.  $\Delta F$  was lower in older  
315 adults (Figure 2A) in both *soleus* ( $d = -0.93$ ; Figure 3A) and *tibialis anterior* ( $d = -1.38$ ;  
316 Figure 3A). There were effects of age ( $\beta = -2.14$ , 95% CI =  $-2.98, -1.33$ ;  $p < .001$ ) and  
317 muscle ( $\beta = 3.71$ , 95% CI =  $2.64, 4.83$ ;  $p < .001$ ) on peak discharge rate, but there was no age  
318 by muscle effect on peak discharge rate ( $\beta = 0.11$ , 95% CI =  $-1.37, 1.56$ ;  $p = .88$ ). Peak  
319 discharge rate was lower in older adults (Figure 2B) in both *soleus* ( $d = -0.98$ ; Figure 3B)  
320 and *tibialis anterior* ( $d = -1.27$ ; Figure 3B). There was an age effect on recruitment  
321 threshold, with thresholds lower in older adults ( $\beta = -1.50$ , 95% CI =  $-2.89, -0.12$ ;  $p = .040$ ;  
322 Figure 3C). There was no evidence of muscle ( $\beta = 1.12$ , 95% CI =  $-0.35, 2.65$ ;  $p = .15$ ) or  
323 age by muscle ( $\beta = 1.12$ , 95% CI =  $-2.59, 1.38$ ;  $p = .58$ ) effects on recruitment threshold.

324 The results of the additional, composite method, analysis revealed there was effects of  
325 age ( $\beta = -1.18$ , 95% CI =  $-1.85, -0.51$ ;  $p = .002$ ), muscle ( $\beta = 1.37$ , 95% CI =  $0.74, 2.00$ ;  $p <$   
326  $.001$ ), and age by muscle ( $\beta = -1.10$ , 95% CI =  $-1.39, -0.27$ ;  $p = .014$ ) on  $\Delta F$ .  $\Delta F$ s were  
327 lower in older adults in both *soleus* ( $d = -1.54$ ) and *tibialis anterior* ( $d = -2.98$ ), as shown in  
328 Figure 4. Also,  $\Delta F$ s were lower in *soleus* than *tibialis anterior* in young adults (mean  
329 difference =  $-1.37$ , 95% CI =  $-2.27, -0.46$ ;  $p = .008$ ;  $d = -1.79$ ) but not older adults (mean  
330 difference =  $-0.27$ , 95% CI =  $-1.04, 0.51$ ;  $p = .47$ ;  $d = -0.35$ ). The composite method  
331 removed the effect of recruitment threshold on  $\Delta F$  ( $\beta = -0.05$ ,  $p = .61$ ) that was observed  
332 when modelling the pairwise method data ( $\beta = 0.47$ ,  $p < .001$ ).

333 The analysis of the contribution between  $\Delta F$  and peak discharge rate showed that,  
334 when accounting for the correlation between repeated observations on each participant,  $\Delta F$   
335 explained 53% of the variance in peak discharge rate. There was a statistical effect of  $\Delta F$  on  
336 peak discharge rate ( $\beta = 1.19$ , 95% CI = 0.87, 1.51,  $p = .001$ ).

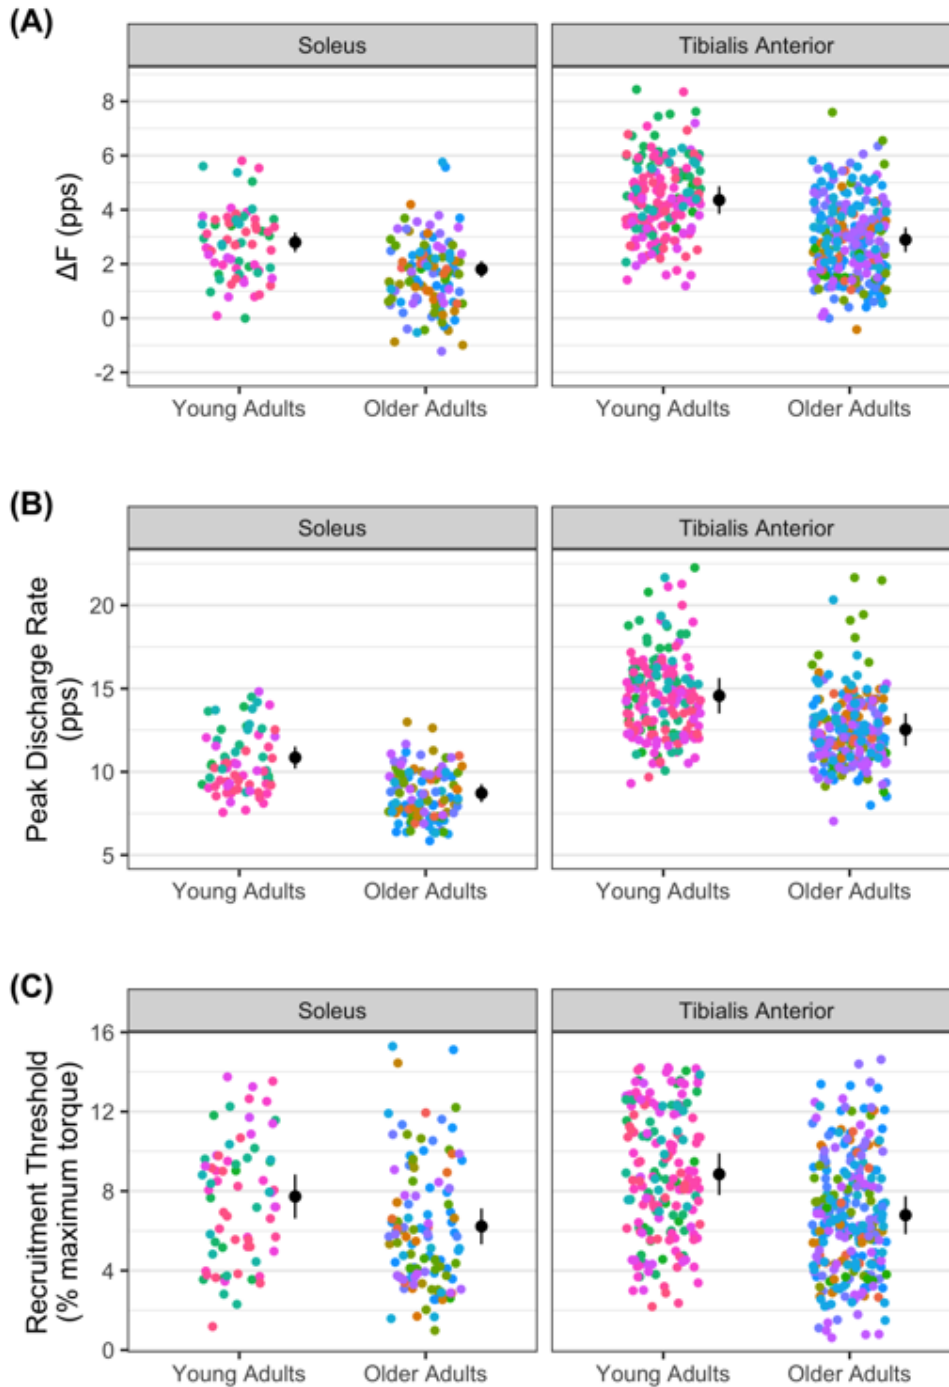

337

338 **Figure 2.**  $\Delta F$  calculated with the pairwise paired motor unit method (A), peak discharge rate

339 (B), and recruitment threshold (C) in *soleus* and *tibialis anterior* in young and older adults.

340 The mean (circle) and 95% confidence interval are offset to the right, with individual data  
341 points coloured by participant. pps = peaks per second.  
342

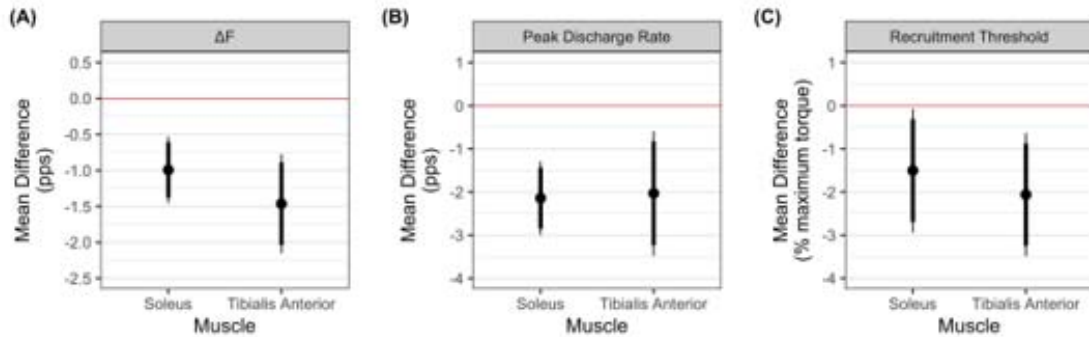

343  
344 **Figure 3.** The marginal mean difference with 90% (thick line) and 95% (thick line)  
345 confidence intervals between young and older adults for  $\Delta F$  calculated with the pairwise  
346 paired motor unit method (A), peak discharge rate (B), and recruitment threshold (RT) (C) in  
347 *soleus* and *tibialis anterior*. Negative values on all panels indicate the lower responses in  
348 older adults. There was an effect of age on  $\Delta F$ , peak discharge rate, and recruitment  
349 threshold, with all variables lower in older adults. There was no age by muscle effect on  $\Delta F$ ,  
350 peak discharge rate, or recruitment threshold—indicating that age-dependent differences in  
351 these variables were similar for both muscles.

352

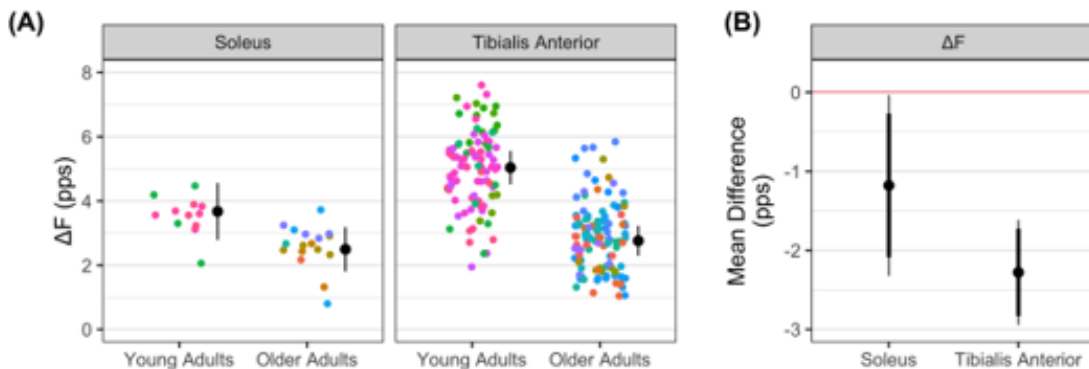

353  
354 **Figure 4.**  $\Delta F$  calculated with the composite paired motor unit method (A), and the marginal  
355 mean difference with 90% (thick line) and 95% (thick line) confidence intervals between  
356 young and older adults for  $\Delta F$  (B). In panel A, the mean (circle) and 95% confidence interval  
357 are offset to the right, with individual data points coloured by participant. In panel B,  
358 negative values indicate  $\Delta F$  was lower responses in older adults. pps = peaks per second.

359



## 360 **Participant characteristics**

361 Participant characteristics are shown in Table 1. Body fat (%) was higher (mean  
362 difference = 12.7% of body mass, 95% CI = 7.1, 18.4;  $p < .001$ ;  $d = 1.40$ ) and appendicular  
363 skeletal muscle mass was lower (mean difference =  $-3.7$  kg, 95% CI =  $-7.3$ ,  $-0.1$ ;  $p = .045$ ;  $d$   
364 =  $-0.63$ ) in older adults than young adults. Handgrip strength was lower in older adults (mean  
365 difference =  $-14.0$  kg, 95% CI =  $-21.2$ ,  $-6.7$ ;  $p < .001$ ;  $d = -1.19$ ). Absolute peak torque was  
366 lower in older adults in both plantar flexion (mean difference =  $-70$  N·m, 95% CI =  $-95$ ,  $-46$ ;  
367  $p < .001$ ;  $d = -1.83$ ) and dorsiflexion (mean difference =  $-12$  N·m, 95% CI =  $-18$ ,  $-5$ ;  $p <$   
368  $.001$ ;  $d = -1.18$ ), as was the normalised peak torque in both plantar flexion (mean difference  
369 =  $-1.02$  N·m·kg<sup>-1</sup>, 95% CI =  $-1.28$ ,  $-0.77$ ;  $p < .001$ ;  $d = -2.45$ ) and dorsiflexion (mean  
370 difference =  $-0.17$  N·m·kg<sup>-1</sup>, 95% CI =  $-0.23$ ,  $-11$ ;  $p < .001$ ;  $d = -1.81$ ).

371 According to the EWGSOP2 sarcopaenia cut-off points and algorithm [50], no  
372 participant was confirmed as sarcopaenic. Three older men and 1 older woman were  
373 classified as “sarcopaenia probable” (handgrip strength  $<27$  kg for men and  $<16$  kg for  
374 women), but their appendicular skeletal muscle mass levels were higher than the cut-off  
375 points, not confirming sarcopaenia ( $>20$  kg for men or  $>15$  kg for women). All older adults  
376 performed the timed up-and-go test in  $<12$  s and were classified as normal mobility.

377 Physical activity levels were not statistically different between young and older adults  
378 (mean difference = 594 MET min/week, 95% CI =  $-1269$ , 2457;  $p = .52$ ;  $d = 0.20$ ), with both  
379 young and older adults presenting with moderate-to-high physical activity levels.

380

## 381 **Motor unit identification**

382 The number of motor units identified in *soleus* was 113 for the young group and  
383 211 for the older group. The median (IQR) number per younger participant was 7 (5–8) and  
384 per older participant 8 (6–9). For *tibialis anterior*, 293 motor units were identified in the  
385 young group and 411 in the older group. The median number per younger participant was 19  
386 (16–23) and per older participant 20 (16–27). For the pairwise paired motor unit analysis, it  
387 was possible to obtain  $\Delta F$  values from 16 young adults and 23 older adults in *soleus*, and  
388 from 16 young adults and 19 older adults in *tibialis anterior*. The number of test unit  $\Delta F$ s for  
389 *soleus* in the young group was 70 and in the older group was 117. The median number per  
390 young participant was 5 (3–6) and per older participant was 4 (3–6). The number of test unit  
391  $\Delta F$ s for *tibialis anterior* in the young group was 185 and in the older group was 257. The  
392 median number per younger participant was 11 (8–14) and per older participant was 14 (9–  
393 18).



394 For the composite paired motor unit analysis, it was possible to obtain  $\Delta F$  values from  
395 4 young adults and 7 older adults for *soleus* and from 15 young adults and 18 older adults for  
396 *tibialis anterior*. The number of test unit  $\Delta F$ s for *soleus* in the young group was 12 and in the  
397 older group was 17, with the median number per younger participant being 3 (3–4) and per  
398 older participant being 2 (1–4). The number of test unit  $\Delta F$ s for *tibialis anterior* in the young  
399 group was 93 and in the older group was 111, with the median number per young participant  
400 being 5 (4–8) and per older participant being 6 (3–8). No motor units were identified in one  
401 young participant and one older participant in *soleus*, and in one young participant and six  
402 older participants in *tibialis anterior*, respectively. These participants were not included in the  
403 analyses for the respective muscles.

404

## 405 DISCUSSION

406 The present study compared amplitudes of motor neuronal PICs, estimated using the  
407 paired motor unit technique ( $\Delta F$ ), between young and older adults. The main findings  
408 indicate that  $\Delta F$  values are considerably lower in both *soleus* and *tibialis anterior* in older  
409 adults. These reductions are accompanied by lower peak discharge rates and the recruitment  
410 of motor units at lower torque levels in the older than younger adults in both muscles. As an  
411 exploratory analysis, a model was developed that showed a small contribution of  $\Delta F$  to the  
412 between-subject variance in peak discharge rates. These findings point to a meaningful  
413 reduction in the intrinsic motor neurone excitability in a group of non-sarcopaenic older  
414 adults with normal mobility that is at least partly associated with a reduced amplitude of  
415 persistent inward currents.

416

### 417 **Estimates of persistent inward currents ( $\Delta F$ )**

418 The  $\Delta F$  values obtained from *soleus* and *tibialis anterior* in young adults are similar  
419 to those obtained in previous studies using triangular-shaped contractions with a 2%/s force  
420 increase-decrease rate [31,36,37] and indicate that  $\Delta F$ s from older adults are substantially  
421 lower than in young adults in both *soleus* and *tibialis anterior*. However, our results partially  
422 differ from previous findings that investigated self-sustained discharging in older humans  
423 [51] and the frequency-current slope in aged rats [18]. Kamen et al., [51] observed no  
424 difference between young and older adults in self-sustained discharging of *tibialis anterior*  
425 motor units when excitatory input was applied by delivering a brief vibration stimulus. In  
426 addition, they have observed no differences between age groups in maximal voluntary force  
427 and no change in force caused by the vibration stimulus. These results could indicate that the

428 reductions in PICs with ageing seem clearer when tested with the paired-motor-unit analysis,  
429 or because older adults present significantly lower force levels than their younger  
430 counterparts. In agreement to our result, Kalmar et al., [18] observed lower frequency-current  
431 slope, which indicate lower PICs amplitude, in older rats hindlimb muscles. However, they  
432 have also reported higher incidence of PICs in older rats, which could be an adaptative  
433 response to counteract the reductions in PICs amplitude, justified by augmentation of the  
434 serotonin and noradrenaline receptor sensitive to residual endogenous monoamines [52].

435 Weaker PICs in older adults can be a result of the detrimental changes within the  
436 monoaminergic systems, which indicate lower release of serotonin and noradrenaline with  
437 ageing. Locus coeruleus and the dorsal raphe nucleus are the major central sources of  
438 noradrenaline and serotonin, respectively [53]. Diminution of structural integrity [19,54] and  
439 in neuromelanin (a product of noradrenaline synthesis) content in noradrenergic neurones  
440 emanating from locus coeruleus [20] indicate impaired noradrenaline secretion in older  
441 adults. Moreover, noradrenaline and serotonin concentration decrements have been observed  
442 in the brains of aged rats [21,22], and degeneration of serotonergic axons projecting to the  
443 ventral horn of the lumbar segment of the spinal cord (where motor neurones innervating  
444 lower limb muscles emanate) have been detected [23]. Also, serotonin receptors are affected  
445 by expanded circulation of cytokines, resulting in increased re-uptake of serotonin [55]. Thus,  
446 older adults might speculatively present reduced noradrenaline and serotonin secretions, and  
447 hence input onto motor neurones, which would then impair the initiation and modulation of  
448 PICs in this population. Changes in motor neurone integrity might also partly underpin  
449 reductions in intrinsic excitability. During ageing, axonal demyelination due to reduced  
450 expression of proteins responsible for myelination [56] as well as axonal atrophy and  
451 degeneration have been observed, possibly subsequent to deregulated  $Ca^{2+}$  homeostasis [57]  
452 and to toxic, metabolic, or infectious injury sustained throughout the lifespan, or due to high  
453 levels of chronic inflammation and oxidative stress [58,59]. Motor neuronal death, especially  
454 in higher-threshold motor axons, leading to denervation of motor units has also been  
455 documented [60]. In these cases, denervated motor units may remodel through reinnervation  
456 by nearby lower-threshold motor neurones [4,61], which may explain the reduced recruitment  
457 threshold observed in the older adults (as discussed below). These detrimental alterations in  
458 motor neurone structure are associated with reduced  $Ca^{2+}$ -mediated plateau potential  
459 durations in striatal neurones (from aged rats) [62], slower conduction velocity of efferent  
460 motor axons [63], lower incidence of doublet discharges, slower maximum discharge rates  
461 [13,14,64] alongside an increased afterhyperpolarisation duration [16], and, as evidenced in

462 the present study, lower PIC amplitude in the motor neurones. It is a logical hypothesis that  
463 the changes within the monoaminergic system and motor neurone structural integrity would  
464 possibly explain the reduced  $\Delta F$ s observed in the present study. However, our findings  
465 indicate the need for further study of the cause-effect relationship between these mechanisms  
466 and reduced PICs in humans.

467 PICs are highly sensitive to synaptic inhibition, and both reciprocal and recurrent  
468 inhibition directly influence intrinsic motor neurone excitability, being effective PIC  
469 deactivators by opposing the facilitatory effects on PICs of descending brainstem  
470 neuromodulatory systems [65–69]. It would therefore be expected that the reduced PIC  
471 amplitude estimates observed in the older adults in the present study might result from an  
472 age-dependent increase in reciprocal and/or recurrent inhibition. However, older adults  
473 present reduced reciprocal inhibition from the common peroneal nerve onto *soleus* and from  
474 the tibial nerve onto the *tibialis anterior* [70]. Also, recurrent inhibition onto the *soleus* motor  
475 neurone pool is suspected to be relatively unaffected by ageing [71]. Therefore, a reasonable  
476 supposition is that the behaviour of spinal inhibitory/excitatory systems (i.e., reduced  
477 reciprocal inhibition and preserved recurrent inhibition) of older adults are unlikely to be  
478 responsible for the decreases in PIC amplitude.

479 The age-related reductions in PIC amplitudes indicated by our data may partly explain  
480 losses in motor function with ageing, and may thus have important clinical practice  
481 implications. Motor neurone PICs can amplify the synaptic input they receive, allowing  
482 motor neurones to discharge at higher rates, as shown in animal, computational modelling,  
483 and human studies [10,11,29,72]. This amplification system is an important feature when  
484 higher-intensity muscular contractions are needed. Thus, weaker motor neurone PICs could  
485 be an important limiting factor which to some extent explains the lower voluntary activation  
486 levels [73] and force production [2] observed in older adults. A lower capacity for producing  
487 high forces as a result of weaker PICs could therefore account for the increase in relative  
488 intensity and level of effort needed for older adults when performing daily activities [74].  
489 This would indicate a reduced performance and increased fatigability when performing these  
490 activities [75]. Moreover, if these assumptions are true then the improvements in force and  
491 functional capacity following resistance training in older adults [76,77] could be partly  
492 mediated by increases in PIC amplitudes [24]. However, these causal hypotheses remain  
493 untested.

494

495 **Recruitment threshold**

496 Motor units that were identified in the older adults in our study showed a lower  
497 recruitment threshold and were thus recruited at a lower torque level than in young adults.  
498 This may be a result of two different factors: 1) the decomposition algorithm may have  
499 biased the identification of motor units towards the lower-threshold ones. Older adults have a  
500 greater proportion of lower-threshold motor units as a result of motor unit remodelling  
501 subsequent to motor neuronal denervation, so motor units previously innervated by higher-  
502 threshold motor units become reinnervated by lower-threshold motor units [61]. Therefore,  
503 the decomposition may have picked up more low-threshold motor units in older adults,  
504 whereas the higher-threshold units in young may bias the decomposition the opposite  
505 direction. 2) The observed lower recruitment thresholds might reflect the recruitment of a  
506 greater relative number of smaller motor neurones during the task. Since motor unit discharge  
507 rate modulation in response to force changes is impaired in older adults, additional motor  
508 units must be recruited earlier in a triangular-shaped contraction to continually increase  
509 muscle force [78,79]. If this is the case, our data in slow isometric contractions indicate that  
510 aged motor neurones have a constrained capacity to amplify the excitatory synaptic input,  
511 consequently demanding an earlier recruitment of additional motor units to achieve the  
512 required motor output.

513 It is important to note that  $\text{Ca}^{2+}$  PIC channels can be activated below the action  
514 potential threshold (i.e., subthreshold PICs), strongly influencing motor unit recruitment [80].  
515 The possibility exists that the population of lower recruitment threshold motor units identified  
516 by the decomposition algorithm in the older adults presents a higher motor neurone  
517 excitability (i.e. enhanced motor neurone recruitment for a given input) because of stronger  
518 subthreshold PIC activation. An increase in the proportion of subthreshold PICs would  
519 reduce the recruitment threshold while also decreasing  $\Delta F$  values. Subthreshold PICs may be  
520 stronger in smaller motor neurones, resulting in a larger overall (sub- plus supra-threshold)  
521 PIC amplitude [31]. However, the  $\Delta F$  method only estimates the suprathreshold contribution  
522 of the PICs to the discharge behaviour of motor units. Consequently, it is not possible to  
523 ascertain the behaviour of subthreshold PICs using the  $\Delta F$  method. Our analytical approach  
524 accounted for any effect of recruitment threshold (and possibly motor neurone size) on  $\Delta F$ ,  
525 that may otherwise confound any motor-unit-population-related effect, by including  
526 recruitment threshold in our modelling of  $\Delta F$ . Further, the reanalysis of  $\Delta F$  using the  
527 composite paired motor unit method appeared to remove the effect of recruitment threshold  
528 on  $\Delta F$  values (from  $\beta = 0.47$ ,  $p < .001$  to  $\beta = -0.05$ ,  $p = .61$ ), which is an expected

529 characteristic of the method [31]. Therefore, the reduced  $\Delta F$ s observed in older adults in the  
530 present study is not likely to have been an artefact of the different populations of motor units  
531 identified between groups.

532

### 533 **Peak discharge rates**

534 The lower  $\Delta F$  values in the older adults were also accompanied by reduced motor  
535 neurone discharge rates. The PIC is an important modulator of discharge rate output [8,29]  
536 and the available monoamines, serotonin and noradrenaline, facilitate PICs to increase motor  
537 neuronal gain and alter the input-output relationship according to the required output  
538 [25,29,81–84]. PICs can amplify synaptic input by more than five-fold, and are thus a  
539 determinant mechanism influencing the capacity for motor neurones to achieve the necessary  
540 discharge rates to obtain very high muscle activation levels [10–12]. We have recently shown  
541 that increases in discharge rate during triangular-shaped contractions at different force levels  
542 were strongly associated with  $\Delta F$  increases, and thus PIC amplitudes, using a within-subject  
543 design [29]. Data from the current study reveal an important contribution of  $\Delta F$  to motor  
544 neurone discharge rates, in which  $\Delta F$  explained 53% of the variance in peak discharge rate.  
545 Motor unit discharge rates are not only modulated by PICs, but also depend on the ionotropic  
546 input they receive. Evidence in both animal [85,86] and human models [87] suggests that the  
547 synaptic input onto the motor neurone decreases with ageing, which may result from  
548 increases in intracortical inhibition or reduced intracortical facilitation in older adults [88–  
549 90]. Therefore, the lower peak discharge rates observed in older adults is a result of the lower  
550 PIC amplitudes and reduced synaptic input (descending drive and afferent feedback) received  
551 by the motor neurones.

552

### 553 **Strengths and limitations**

554 The main strength of our study was the use of two validated [8,25,31] and a widely  
555 used methods to estimate PIC strength in humans [8,25,29,36,38,44,91]; however, both  
556 methods have limitations that should be pointed out [26]. The pairwise method [8] allowed us  
557 to obtain several pairs of motor units, having a larger amount of test units per participant. On  
558 the other hand, this method present a higher variance as a result of under and overestimation  
559 of  $\Delta F$ s as a consequence of adopting control units with varied recruitment thresholds [31].  
560 Recently, Afsharipour et al., [31] proposed the use of a composite control unit to reduce the

561  $\Delta F$  variance present in the conventional paired motor unit analysis. However, this method  
562 requires some additional assumptions, such as the overlay of three lower threshold motor  
563 units with a similar discharge rate profile and with recruitment threshold below 3%. When  
564 following these assumptions, there was an important reduction of motor unit pairs,  
565 particularly for *soleus*. Therefore, we initially adopted the pairwise method as it permitted  
566 comparison between *soleus* and *tibialis anterior*  $\Delta F$ s. We also ran the composite method as  
567 an additional analysis to examine whether reducing  $\Delta F$  variability and removing the influence  
568 of the recruitment threshold on  $\Delta F$  obtained with the pairwise method would affect our main  
569 outcomes. Using both methods allowed us to identify a large difference in  $\Delta F$  between young  
570 and older adults, minimising the methodological limitations. Furthermore, it is worth  
571 mentioning that the assessors were not blinded to age group when visually inspecting and  
572 editing the motor units and future studies should confirm this with blinded assessors.

573         The lower recruitment threshold observed in the older adults may have been a result  
574 of bias of the decomposition algorithm because of the greater proportion of this type of motor  
575 units in this population. Therefore, caution should be taken when interpreting the differences  
576 in the recruitment threshold of motor units identified between these two heterogeneous  
577 groups. Indeed, our analytical approach included the variable recruitment threshold when  
578 modelling  $\Delta F$  aiming to control any potential confounding factor related to potential different  
579 physiological behaviours of distinct populations of motor units.

580         Furthermore,  $\Delta F$  values obtained in our study are derived from lower threshold *soleus*  
581 and *tibialis anterior* motor units recruited at a low force level (20% of peak torque); this is a  
582 commonly-used force target and is also similar to forces that might be expected in daily  
583 activities such as standing [39] and walking. However, older adults perform activities such as  
584 chair rise and both stair ascent and descent at a higher level of effort relative to their  
585 maximum capability [74] than young adults. Consequently, the  $\Delta F$  data obtained during low  
586 force levels might not represent the motor neurone PIC behaviour at these daily activities  
587 requiring higher intensity contractions. Indeed, there is evidence that the function and  
588 structure of higher threshold motor neurones are more affected than lower threshold motor  
589 neurones [1]. This could hypothetically indicate a greater impairment in PICs during higher  
590 intensity contractions. Moreover, daily activities require the activation of different muscle  
591 groups. Motor neurones from distinct muscles depict different discharge behaviours during  
592 ageing [14]; thus, it is possible that  $\Delta F$  behaviour might also differ. Therefore, we  
593 recommend that future studies investigate the effect of ageing on  $\Delta F$  values from different

594 muscles and at different contraction intensities, and its influence on possible impairments in  
595 physical function.

596 The cross-sectional design and the small group of tested individuals are additional  
597 limitations inherent to our study that should be mentioned. A cross-section study does not  
598 allow one to parse out causation *per se*. Longitudinal studies would involve repeated data  
599 collection from the same sample over several years to provide a better understanding of the  
600 effects of ageing on  $\Delta F$ . In addition, the small group of non-sarcopaenic older adults with  
601 normal mobility tested in the present study does not allow our results to be extrapolated to  
602 populations with different characteristics or health conditions, such as very old (>85 years  
603 old), sarcopaenic, frail, or those with neurological disorders. They may also not represent  
604 individuals who consistently perform high levels of physical activity. Having a broader  
605 spectrum of older adults with low to high physical function and force levels would allow a  
606 more adequate investigation of the relationship between  $\Delta F$  with these parameters.

607

## 608 **Conclusions**

609 The present study provides novel evidence of reduced intrinsic motor neurone  
610 excitability in a group of non-sarcopaenic older adults with normal mobility by estimating  
611 PIC amplitudes using the paired-motor unit analyses. Older adults had substantially lower  
612  $\Delta F$ s, and presumably PIC amplitudes, in both *soleus* and *tibialis anterior* than young adults  
613 with comparable physical activity level. This would likely influence the capacity of older  
614 individuals to activate the muscles, thus requiring a greater descending drive from cortical  
615 areas and hence level of volitional effort, and greater number of recruited motor units to  
616 achieve the same force level (relative to maximum). We also identified a small contribution  
617 of  $\Delta F$  to the between-subject variability in peak discharge rates. The present findings  
618 contribute to our understanding of the effects of ageing on motor neurone excitability, which  
619 is a potential mechanism underpinning motor functional loss during ageing; this hypothesis  
620 should be explicitly tested in future studies. Two logical next steps are: 1) to examine the  
621 effect of ageing on monoaminergic projections onto the motor neurones and their relationship  
622 with the reduced PIC amplitude observed in the present study; 2) to investigate the  
623 association between  $\Delta F$  values for motor units in different muscles and the variance in  
624 performance on clinical tests of motor function.

625

## 626 **ADDITIONAL INFORMATION**

### 627 **Data and code availability**



628 The dataset and R code are available at <https://github.com/orssatto/PICs-ageing>.

629

### 630 **Competing interests**

631 The authors declare no competing interest related to this manuscript.

632

633

634

### 635 **Author contributions**

636 LBRO, AJS, AJB, and GST contributed with the conception and design of the work. LBRO  
637 acquired data. RLS developed the MATLAB script for  $\Delta F$ , peak discharge rate, and  
638 recruitment threshold calculation. LBRO conducted the biological signals data analyses, and  
639 DNB developed the R script and conducted statistical analyses. All authors interpreted and  
640 discussed the data, drafted the manuscript, and revised it critically providing important  
641 intellectual content.

642

643 All authors approved the final version of the manuscript; agree to be accountable for all  
644 aspects of the work in ensuring that questions related to the accuracy or integrity of any part  
645 of the work are appropriately investigated and resolved; and qualify for authorship, and all  
646 those who qualify for authorship are listed.

647

### 648 **Funding**

649 There is no specific funding related to this manuscript.

650 REFERENCES

- 651 1 Orssatto LB da R, Wiest MJ, Diefenthaler F. Neural and musculotendinous  
652 mechanisms underpinning age-related force reductions. *Mech Ageing Dev*  
653 2018;**175**:17–23. doi:10.1016/j.mad.2018.06.005
- 654 2 Suetta C, Haddock B, Alcazar J, *et al.* The Copenhagen Sarcopenia Study: lean mass,  
655 strength, power, and physical function in a Danish cohort aged 20–93 years. *J*  
656 *Cachexia Sarcopenia Muscle* 2019;;1–13. doi:10.1002/jcsm.12477
- 657 3 Vandervoort A a. Aging of the human neuromuscular system. *Muscle and Nerve*  
658 2002;**25**:17–25. doi:10.1002/mus.1215
- 659 4 Manini TM, Hong SL, Clark BC. Aging and muscle: a neuron’s perspective. *Curr*  
660 *Opin Clin Nutr Metab Care* 2013;**16**:1–10.  
661 doi:10.1097/MCO.0b013e32835b5880.Aging
- 662 5 Larsson L, Degens H, Li M, *et al.* Sarcopenia: Aging-Related Loss of Muscle Mass  
663 and Function. *Physiol Rev* 2019;**99**:427–511. doi:10.1152/physrev.00061.2017
- 664 6 Aagaard P, Suetta C, Caserotti P, *et al.* Role of the nervous system in sarcopenia and  
665 muscle atrophy with aging: Strength training as a countermeasure. *Scand J Med Sci*  
666 *Sport* 2010;**20**:49–64.
- 667 7 Heckman CJ, Enoka RM. Motor unit. *Compr Physiol* 2012;**2**:2629–82.  
668 doi:10.1002/cphy.c100087
- 669 8 Gorassini M, Yang JF, Siu M, *et al.* Intrinsic activation of human motoneurons:  
670 Possible contribution to motor unit excitation. *J Neurophysiol* 2002;**87**:1850–8.  
671 doi:10.1152/jn.00024.2001
- 672 9 Heckman CJ, Gorassini MA, Bennett DJ. Persistent inward currents in motoneuron  
673 dendrites: Implications for motor output. *Muscle and Nerve* 2005;**31**:135–56.  
674 doi:10.1002/mus.20261
- 675 10 Lee RH, Heckman CJ. Enhancement of bistability in spinal motoneurons in vivo by  
676 the noradrenergic  $\alpha 1$  agonist methoxamine. *J Neurophysiol* 1999;**81**:2164–74.  
677 doi:10.1152/jn.1999.81.5.2164
- 678 11 Lee RH, Heckman CJ. Adjustable amplification of synaptic input in the dendrites of  
679 spinal motoneurons in vivo. *J Neurosci* 2000;**20**:6734–40.
- 680 12 Hounsgaard J, Kiehn O. Calcium spikes and calcium plateaux evoked by differential  
681 polarization in dendrites of turtle motoneurons in vitro. *J Physiol* 1993;**468**:245–59.  
682 doi:10.1113/jphysiol.1993.sp019769
- 683 13 Orssatto LBR, Borg D, Pendrith L, *et al.* Do motoneurons slow with aging? A

- 684 systematic review and meta-analysis with meta-regression. *bioRxiv*. 2020.  
685 doi:10.1101/2020.12.15.422812
- 686 14 Kirk EA, Christie AD, Knight CA, *et al.* Motor unit firing rates during constant  
687 isometric contraction □: establishing and comparing an age-related pattern among  
688 muscles. *J Appl Physiol* Published Online First: 2021.  
689 doi:<https://doi.org/10.1152/jappphysiol.01047.2020>
- 690 15 Christie A, Kamen G. Doublet discharges in motoneurons of young and older adults. *J*  
691 *Neurophysiol* 2006;**95**:2787–95. doi:10.1152/jn.00685.2005
- 692 16 Piotrkiewicz M, Kudina L, Mierzejewska J, *et al.* Age-related change in duration of  
693 afterhyperpolarization of human motoneurons. *J Physiol* 2007;**585**:483–90.  
694 doi:10.1113/jphysiol.2007.142356
- 695 17 Morales FR, Boxer PA, Fung SJ, *et al.* Basic electrophysiological properties of spinal  
696 cord motoneurons during old age in the cat. *J Neurophysiol* 1987;**58**:180–94.  
697 doi:10.1152/jn.1987.58.1.180
- 698 18 Kalmar JM, Button DC, Gardiner K, *et al.* Caloric restriction does not offset age-  
699 associated changes in the biophysical properties of motoneurons. *J Neurophysiol*  
700 2009;**101**:548–57. doi:10.1152/jn.90617.2008
- 701 19 Liu KY, Kievit RA, Tsvetanov KA, *et al.* Noradrenergic-dependent functions are  
702 associated with age-related locus coeruleus signal intensity differences. *Nat Commun*  
703 2020;**11**:1–9. doi:10.1038/s41467-020-15410-w
- 704 20 Shibata E, Sasaki M, Tohyama K, *et al.* Age-related changes in locus ceruleus on  
705 neuromelanin magnetic resonance imaging at 3 Tesla. *Magn Reson Med Sci*  
706 2006;**5**:197–200. doi:10.2463/mrms.5.197
- 707 21 Ko ML, King MA, Gordon TL, *et al.* The effects of aging on spinal neurochemistry in  
708 the rat. *Brain Res Bull* 1997;**42**:95–8. doi:10.1016/S0361-9230(96)00216-X
- 709 22 Míguez JM, Aldegunde M, Paz-Valiñas L, *et al.* Selective changes in the contents of  
710 noradrenaline, dopamine and serotonin in rat brain areas during aging. *J Neural*  
711 *Transm* 1999;**106**:1089–98. doi:10.1007/s007020050225
- 712 23 Johnson H, Ulfhake B, Dagerlind Å, *et al.* The serotonergic bulbospinal system and  
713 brainstem □ spinal cord content of serotonin □, TRH □, and substance P □ like  
714 immunoreactivity in the aged rat with special reference to the spinal cord motor  
715 nucleus. *Synapse* 1993;**15**:63–89. doi:10.1002/syn.890150108
- 716 24 Latella C. Pick me, Pick me! Rationale for investigating persistent inward currents  
717 (PICs) and associated exercise effects in the ageing neuromuscular system. *J Physiol*

- 718 2021;**599**:1957–9. doi:10.1113/JP281324
- 719 25 Powers RK, Nardelli P, Cope TC. Estimation of the contribution of intrinsic currents to  
720 motoneuron firing based on paired motoneuron discharge records in the decerebrate  
721 cat. *J Neurophysiol* 2008;**100**:292–303. doi:10.1152/jn.90296.2008
- 722 26 Stephenson JL, Maluf KS. Dependence of the paired motor unit analysis on motor unit  
723 discharge characteristics in the human tibialis anterior muscle. *J Neurosci Methods*  
724 2011;**198**:84–92. doi:10.1016/j.jneumeth.2011.03.018
- 725 27 Holobar A, Zazula D. Multichannel blind source separation using convolution Kernel  
726 compensation. *IEEE Trans Signal Process* 2007;**55**:4487–96.  
727 doi:10.1109/TSP.2007.896108
- 728 28 Enoka RM. Physiological validation of the decomposition of surface EMG signals. *J*  
729 *Electromyogr Kinesiol* 2019;**46**:70–83. doi:10.1016/j.jelekin.2019.03.010
- 730 29 Orssatto LBR, Mackay K, Shield AJ, *et al.* Estimates of persistent inward currents  
731 increase with the level of voluntary drive in low-threshold motor units of plantar flexor  
732 muscles. *J Neurophysiol* 2021;:6. doi:10.1152/jn.00697.2020
- 733 30 Revill AL, Fuglevand AJ. Effects of persistent inward currents, accommodation, and  
734 adaptation on motor unit behavior: A simulation study. *J Neurophysiol*  
735 2011;**106**:1467–79. doi:10.1152/jn.00419.2011
- 736 31 Afsharipour B, Manzur N, Duchcherer J, *et al.* Estimation of self-sustained activity  
737 produced by persistent inward currents using firing rate profiles of multiple motor  
738 units in humans. *J Neurophysiol* 2020;**124**:63–85. doi:10.1152/jn.00194.2020
- 739 32 Polcyn AE, Kerrigan DC, Collins JJ. Age-Related Changes in the Initiation of Gait:  
740 Degradation of Central Mechanisms for Momentum Generation. *Arch Phys Med*  
741 *Rehabil* 1998;**79**:1582–9.
- 742 33 Laughton CA, Slavin M, Katdare K, *et al.* Aging, muscle activity, and balance control:  
743 Physiologic changes associated with balance impairment. *Gait Posture* 2003;**18**:101–8.  
744 doi:10.1016/S0966-6362(02)00200-X
- 745 34 Hagströmer M, Oja P, Sjöström M. The International Physical Activity Questionnaire  
746 (IPAQ): a study of concurrent and construct validity. *Public Health Nutr* 2006;**9**:755–  
747 62. doi:10.1079/phn2005898
- 748 35 IPAQ. Guidelines for Data Processing and Analysis of the International Physical  
749 Activity Questionnaire (IPAQ) – Short and Long Forms. 2005.  
750 <https://sites.google.com/site/theipaq/scoring-protocol>
- 751 36 Trajano GS, Taylor JL, Orssatto LBR, *et al.* Passive muscle stretching reduces

- 752 estimates of persistent inward current strength in soleus motor units. *J Exp Biol*  
753 2020;**223**:jeb.229922. doi:10.1242/jeb.229922
- 754 37 Kim EH, Wilson JM, Thompson CK, *et al.* Differences in Estimated Persistent Inward  
755 Currents Between Ankle Flexors and 2 Extensors in Humans. *J Neurophysiol*  
756 2020;**21**:1–9.
- 757 38 Hassan AS, Thompson CK, Negro F, *et al.* Impact of parameter selection on estimates  
758 of motoneuron excitability using paired motor unit analysis. *J Neural Eng* 2020;**17**.  
759 doi:10.1088/1741-2552/ab5eda
- 760 39 Cattagni T, Scaglioni G, Laroche D, *et al.* The involvement of ankle muscles in  
761 maintaining balance in the upright posture is higher in elderly fallers. *Exp Gerontol*  
762 2016;**77**:38–45. doi:10.1016/j.exger.2016.02.010
- 763 40 da Silva ME, Orssatto LB da R, Bezerra E de S, *et al.* Reducing measurement errors  
764 during functional capacity tests in elders. *Aging Clin Exp Res* 2018;**30**:595–603.  
765 doi:10.1007/s40520-017-0820-x
- 766 41 Bischoff HA, Stähelin HB, Monsch AU, *et al.* Identifying a cut-off point for normal  
767 mobility: A comparison of the timed ‘up and go’ test in community-dwelling and  
768 institutionalised elderly women. *Age Ageing* 2003;**32**:315–20.  
769 doi:10.1093/ageing/32.3.315
- 770 42 Holobar A, Minetto MA, Farina D. Accurate identification of motor unit discharge  
771 patterns from high-density surface EMG and validation with a novel signal-based  
772 performance metric. *J Neural Eng* 2014;**11**. doi:10.1088/1741-2560/11/1/016008
- 773 43 Binder MD, Powers RK, Heckman CJ. Nonlinear Input-Output Functions of  
774 Motoneurons. *Physiology (Bethesda)* 2020;**35**:31–9. doi:10.1152/physiol.00026.2019
- 775 44 Udina E, D’Amico J, Bergquist AJ, *et al.* Amphetamine increases persistent inward  
776 currents in human motoneurons estimated from paired motor-unit activity. *J*  
777 *Neurophysiol* 2010;**103**:1295–303. doi:10.1152/jn.00734.2009
- 778 45 Vandenberg MS, Kalmar JM. An evaluation of paired motor unit estimates of  
779 persistent inward current in human motoneurons. *J Neurophysiol* 2014;**111**:1877–84.  
780 doi:10.1152/jn.00469.2013
- 781 46 Desmedt BJE, Godaux E. Ballistic contractions in man: Characteristic recruitment  
782 pattern of single motor units of the tibialis anterior muscle. *J Physiol* 1977;**264**:673–  
783 93.
- 784 47 Kuznetsova A, Brockhoff PB, Christensen RHB. lmerTest Package: Tests in Linear  
785 Mixed Effects Models. *J Stat Softw* 2017;**82**. doi:10.18637/jss.v082.i13

- 786 48 Lenth R V., Buerkner P, Herve M, *et al.* emmeans: Estimated Marginal Means, aka  
787 Least-Squares Means - R package. 2021. <https://github.com/rvlenth/emmeans>
- 788 49 Nakagawa S, Johnson PCD, Schielzeth H. The coefficient of determination R<sup>2</sup> and  
789 intra-class correlation coefficient from generalized linear mixed-effects models  
790 revisited and expanded. *J R Soc Interface* 2017;**14**. doi:10.1098/rsif.2017.0213
- 791 50 Cruz-Jentoft AJ, Bahat G, Bauer J, *et al.* Sarcopenia: revised European consensus on  
792 definition and diagnosis. *Age Ageing* 2019;:1–16. doi:10.1093/ageing/afy169
- 793 51 Kamen G, Sullivan R, Rubinstein S, *et al.* Evidence of self-sustained motoneuron  
794 firing in young and older adults. *J Electromyogr Kinesiol* 2006;**16**:25–31.  
795 doi:10.1016/j.jelekin.2005.06.008
- 796 52 Harvey PJ, Li X, Li Y, *et al.* Endogenous monoamine receptor activation is essential  
797 for enabling persistent sodium currents and repetitive firing in rat spinal motoneurons.  
798 *J Neurophysiol* 2006;**96**:1171–86. doi:10.1152/jn.00341.2006
- 799 53 Cassano T, Gaetani S, Morgese MG, *et al.* Monoaminergic Changes in Locus  
800 Coeruleus and Dorsal Raphe Nucleus Following Noradrenaline Depletion. *Neurochem*  
801 *Res* 2009;**34**:1417–26. doi:10.1007/s11064-009-9928-5
- 802 54 Liu KY, Acosta-Cabronero J, Cardenas-Blanco A, *et al.* In vivo visualization of age-  
803 related differences in the locus coeruleus. *Neurobiol Aging* 2019;**74**:101–11.  
804 doi:10.1016/j.neurobiolaging.2018.10.014
- 805 55 Michaud M, Balardy L, Moulis G, *et al.* Proinflammatory cytokines, aging, and age-  
806 related diseases. *J Am Med Dir Assoc* 2013;**14**:877–82.  
807 doi:10.1016/j.jamda.2013.05.009
- 808 56 Pannese E. Morphological changes in nerve cells during normal aging. *Brain Struct*  
809 *Funct* 2011;**216**:85–9. doi:10.1007/s00429-011-0308-y
- 810 57 Nikolettou V, Tavernarakis N. Calcium homeostasis in aging neurons. *Front*  
811 *Genet* 2012;**3**:1–17. doi:10.3389/fgene.2012.00200
- 812 58 Misgeld T. Lost in elimination: mechanisms of axonal loss. *e-Neuroforum* 2011;**2**:21–  
813 34. doi:10.1007/s13295-011-0017-2
- 814 59 Selman C, Blount JD, Nussey DH, *et al.* Oxidative damage, ageing, and life-history  
815 evolution: Where now? *Trends Ecol Evol* 2012;**27**:570–7.  
816 doi:10.1016/j.tree.2012.06.006
- 817 60 Gordon T, Hegedus J, Tam SL. Adaptive and Maladaptive Motor Axonal Sprouting in  
818 Aging and Motoneuron Disease. *Neurol Res* 2004;**26**:174–85.  
819 doi:10.1179/016164104225013806

- 820 61 Piasecki M, Ireland A, Jones DA, *et al.* Age-dependent motor unit remodelling in  
821 human limb muscles. *Biogerontology* 2016;**17**:485–96. doi:10.1007/s10522-015-9627-  
822 3
- 823 62 Dunia R, Buckwalter G, Defazio T, *et al.* Decreased duration of Ca<sup>2+</sup>-mediated  
824 plateau potentials in striatal neurons from aged rats. *J Neurophysiol* 1996;**76**:2353–63.  
825 doi:10.1152/jn.1996.76.4.2353
- 826 63 Di Iorio A, Cherubini A, Volpato S, *et al.* Markers of inflammation, Vitamin E and  
827 peripheral nervous system function. The InCHIANTI study. *Neurobiol Aging*  
828 2006;**27**:1280–8. doi:10.1016/j.neurobiolaging.2005.07.004
- 829 64 Klass M, Baudry S, Duchateau J. Age-related decline in rate of torque development is  
830 accompanied by lower maximal motor unit discharge frequency during fast  
831 contractions. *J Appl Physiol* 2008;**104**:739–46. doi:10.1152/jappphysiol.00550.2007
- 832 65 Hyngstrom AS, Johnson MD, Miller JF, *et al.* Intrinsic electrical properties of spinal  
833 motoneurons vary with joint angle. *Nat Neurosci* 2007;**10**:363–9. doi:10.1038/nn1852
- 834 66 Hyngstrom AS, Johnson MD, Heckman CJ. Summation of excitatory and inhibitory  
835 synaptic inputs by motoneurons with highly active dendrites. *J Neurophysiol*  
836 2008;**99**:1643–52. doi:10.1152/jn.01253.2007
- 837 67 Bui T V., Grande G, Rose PK. Relative location of inhibitory synapses and persistent  
838 inward currents determines the magnitude and mode of synaptic amplification in  
839 motoneurons. *J Neurophysiol* 2008;**99**:583–94. doi:10.1152/jn.00718.2007
- 840 68 Bui T V., Grande G, Rose PK. Multiple modes of amplification of synaptic inhibition  
841 to motoneurons by persistent inward currents. *J Neurophysiol* 2008;**99**:571–82.  
842 doi:10.1152/jn.00717.2007
- 843 69 Kuo JJ, Lee RH, Johnson MD, *et al.* Active Dendritic Integration of Inhibitory  
844 Synaptic Inputs in Vivo. *J Neurophysiol* 2003;**90**:3617–24. doi:10.1152/jn.00521.2003
- 845 70 Kido A, Tanaka N, Stein RB. Spinal excitation and inhibition decrease as humans age.  
846 *Can J Physiol Pharmacol* 2004;**82**:238–48. doi:10.1139/y04-017
- 847 71 Chalmers GR, Knutzen KM. Recurrent inhibition in the soleus motor pool of elderly  
848 and young adults. *Electromyogr Clin Neurophysiol* 2004;**44**:413–21.
- 849 72 Hounsgaard J, Hultborn H, Jespersen B, *et al.* Bistability of alpha motoneurons in  
850 the decerebrate cat and in the acute spinal cat after intravenous 5-hydroxytryptophan.  
851 *J Physiol* 1988;**405**:345–67. doi:10.1113/jphysiol.1988.sp017336
- 852 73 Rozand V, Sundberg CW, Hunter SK, *et al.* Age-related Deficits in Voluntary  
853 Activation: A Systematic Review and Meta-analysis. *Med Sci Sports Exerc*



- 854 2020;**52**:549–60. doi:10.1249/MSS.0000000000002179
- 855 74 Hortobágyi T, Mizelle C, Beam S, *et al.* Old adults perform activities of daily living  
856 near their maximal capabilities. *J Gerontol A Biol Sci Med Sci* 2003;**58**:M453–60.  
857 doi:10.1093/gerona/58.5.M453
- 858 75 Richardson CA, Glynn NW, Ferrucci LG, *et al.* Walking energetics, fatigability, and  
859 fatigue in older adults: The study of energy and aging pilot. *Journals Gerontol - Ser A*  
860 *Biol Sci Med Sci* 2015;**70**:487–94. doi:10.1093/gerona/glu146
- 861 76 Csapo R, Alegre LM. Effects of resistance training with moderate vs heavy loads on  
862 muscle mass and strength in the elderly: A meta-analysis. *Scand J Med Sci Sports*  
863 2016;**26**:995–1006. doi:10.1111/sms.12536
- 864 77 da Rosa Orssatto LB, de la Rocha Freitas C, Shield AJ, *et al.* Effects of resistance  
865 training concentric velocity on older adults' functional capacity: A systematic review  
866 and meta-analysis of randomised trials. *Exp. Gerontol.* 2019;**127**.  
867 doi:10.1016/j.exger.2019.110731
- 868 78 Barry BK, Pascoe MA, Jesunathadas M, *et al.* Rate coding is compressed but  
869 variability is unaltered for motor units in a hand muscle of old adults. *J Neurophysiol*  
870 2007;**97**:3206–18. doi:10.1152/jn.01280.2006
- 871 79 Enoka RM, Duchateau J. Rate coding and the control of muscle force. *Cold Spring*  
872 *Harb Perspect Med* 2017;**7**. doi:10.1101/cshperspect.a029702
- 873 80 Li Y, Gorassini MA, Bennett DJ. Role of Persistent Sodium and Calcium Currents in  
874 Motoneuron Firing and Spasticity in Chronic Spinal Rats. *J Neurophysiol*  
875 2004;**91**:767–83. doi:10.1152/jn.00788.2003
- 876 81 Huh S, Siripuram R, Lee RH, *et al.* PICs in motoneurons do not scale with the size of  
877 the animal: A possible mechanism for faster speed of muscle contraction in smaller  
878 species. *J Neurophysiol* 2017;**118**:93–102. doi:10.1152/jn.00045.2017
- 879 82 Heckman CJ. Computer simulations of the effects of different synaptic input systems  
880 on the steady-state input-output structure of the motoneuron pool. *J Neurophysiol*  
881 1994;**71**:1727–39. doi:10.1152/jn.1994.71.5.1727
- 882 83 Heckman CJ, Binder MD. Computer simulation of the steady-state input-output  
883 function of the cat medial gastrocnemius motoneuron pool. *J Neurophysiol*  
884 1991;**65**:952–67. doi:10.1152/jn.1991.65.4.952
- 885 84 Powers RK, Heckman CJ. Contribution of intrinsic motoneuron properties to discharge  
886 hysteresis and its estimation based on paired motor unit recordings: A simulation  
887 study. *J Neurophysiol* 2015;**114**:184–98. doi:10.1152/jn.00019.2015

- 888 85 Maxwell N, Castro RW, Sutherland NM, *et al.*  $\alpha$ -Motor neurons are spared from aging  
889 while their synaptic inputs degenerate in monkeys and mice. *Aging Cell* 2018;**17**.  
890 doi:10.1111/accel.12726
- 891 86 Chase MH, Morales FR, Boxer PA, *et al.* Aging of motoneurons and synaptic  
892 processes in the cat. *Exp Neurol* 1985;**90**:471–8. doi:10.1016/0014-4886(85)90035-4
- 893 87 Rowe JB, Siebner H, Filipovic SR, *et al.* Aging is associated with contrasting changes  
894 in local and distant cortical connectivity in the human motor system. *Neuroimage*  
895 2006;**32**:747–60. doi:10.1016/j.neuroimage.2006.03.061
- 896 88 Todd G, Taylor JL, Gandevia SC. Measurement of voluntary activation of fresh and  
897 fatigued human muscles using transcranial magnetic stimulation. *J Physiol*  
898 2003;**551**:661–71. doi:10.1113/jphysiol.2003.044099
- 899 89 Opie GM, Hand BJ, Semmler JG. Age-related changes in late synaptic inputs to  
900 corticospinal neurons and their functional significance: A paired-pulse TMS study.  
901 *Brain Stimul* 2020;**13**:239–46. doi:10.1016/j.brs.2019.08.003
- 902 90 McGinley M, Hoffman RL, Russ DW, *et al.* Older adults exhibit more intracortical  
903 inhibition and less intracortical facilitation than young adults. *Exp Gerontol*  
904 2010;**45**:671–8. doi:10.1016/j.exger.2010.04.005
- 905 91 Hassan AS, Kim EH, Khurram OU, *et al.* Properties of Motor Units of Elbow and  
906 Ankle Muscles Decomposed Using High-Density Surface EMG. *Proc Annu Int Conf*  
907 *IEEE Eng Med Biol Soc EMBS* 2019;:3874–8. doi:10.1109/EMBC.2019.8857475  
908
